# Supplementary material for: A novel explanation for the increased conductivity in annealed Al-doped ZnO: an insight into migration of aluminum and displacement of zinc
Source: Royal Society of Chemistry journal article supplement (doi:10.1039/c7cp02936e), 2017-01-01
Supplement: c7cp02936e1.pdf [file c7cp02936e1.pdf]

# **A novel explanation of increased conductivity in annealed Al-doped ZnO: an insight into migration of aluminum and displacement of zinc: Supplementary data**

## **Authors:**

**A. Momot<sup>a</sup>, M.N. Amini<sup>c</sup>, G. Reekmans<sup>b</sup>, P. Adriaensens<sup>b</sup>, D. Lamoen<sup>c</sup>, B. Partoens<sup>c</sup>, D. R. Slocombe<sup>d</sup>, K. Elen<sup>a</sup>, A. Hardy<sup>a</sup>, M. K. Van Bael<sup>a</sup>**

## **Affiliations**

a) UHasselt - Hasselt University, Institute for Materials Research (IMO-IMOMEC), Inorganic and Physical Chemistry, Agoralaan, 3590 Diepenbeek, Belgium

b) UHasselt - Hasselt University, Institute for Materials Research (IMO-IMOMEC), Applied and Analytical Chemistry, Agoralaan, 3590 Diepenbeek, Belgium

c) CMT & EMAT, Department of Physics, University of Antwerp, Groenenborgerlaan 171, B-2020 Antwerp, Belgium

d) School of Engineering, Cardiff University, Queen's Buildings, The Parade, Cardiff, CF24 3AA, UK.

## Raman analysis

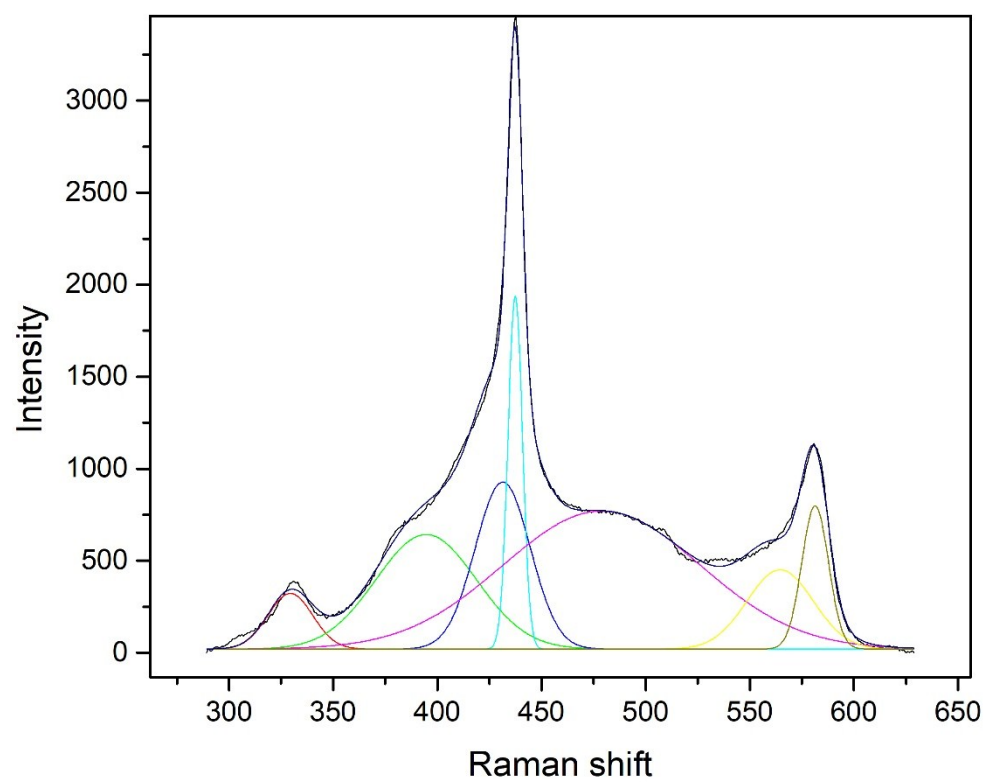

S1. Deconvoluted spectrum of as synthesized AZO.

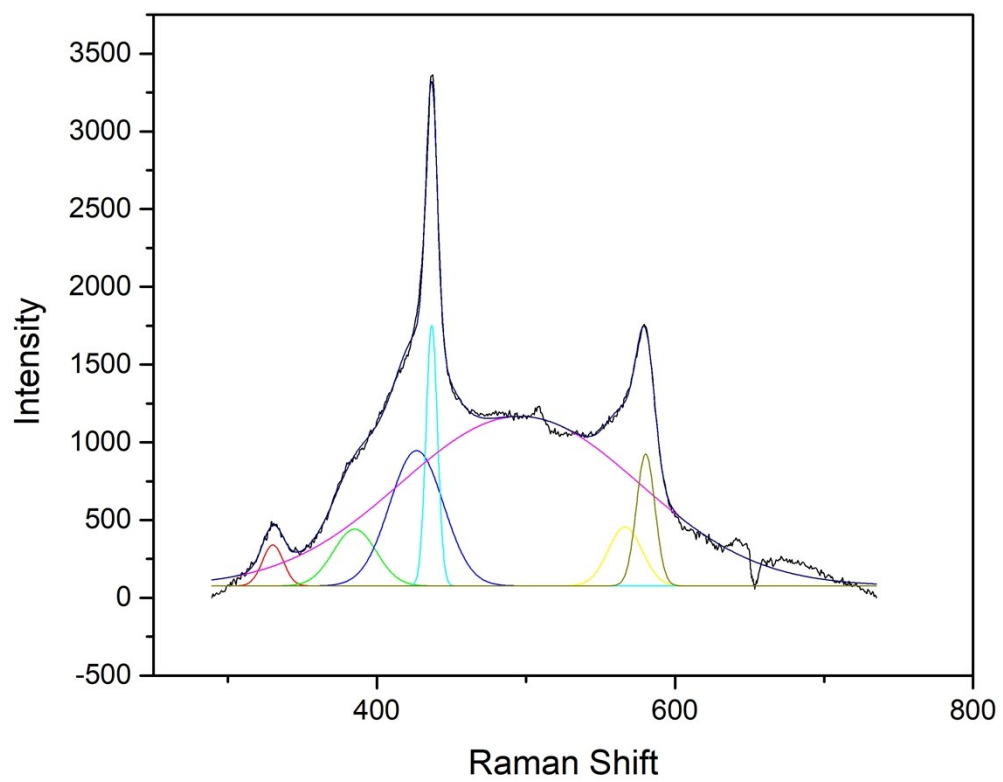

S2. Deconvoluted spectrum of annealed AZO sample
